# Supplementary material for: Distinct expression of CDCA3, CDCA5, and CDCA8 leads to shorter relapse free survival in breast cancer patient
Source: PubMed Central journal article supplement (PMC5805530; doi:10.18632/oncotarget.24059), 2018-01-09
Supplement: oncotarget-09-6977-s001.pdf [file oncotarget-09-6977-s001.pdf]

# Distinct expression of CDCA3, CDCA5, and CDCA8 leads to shorter relapse free survival in breast cancer patient

## SUPPLEMENTARY MATERIALS

### A CDCA4

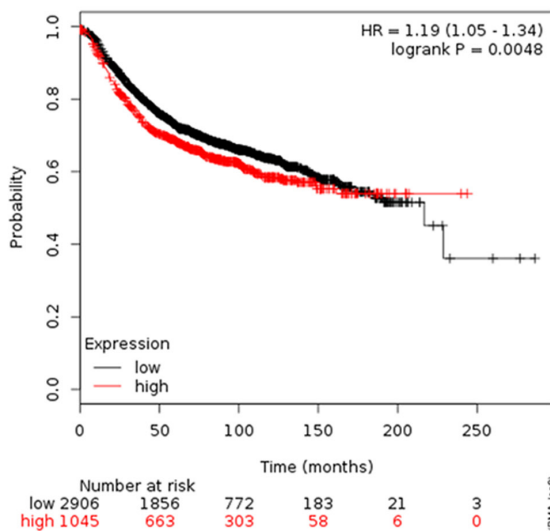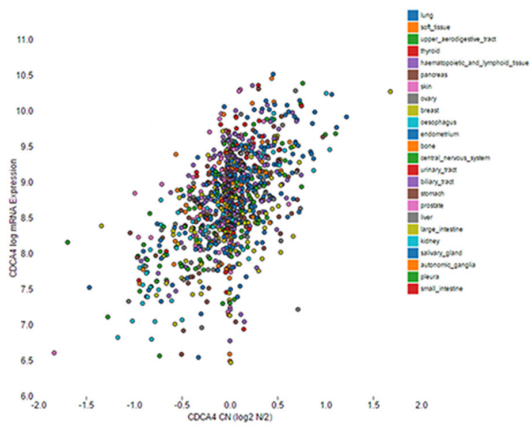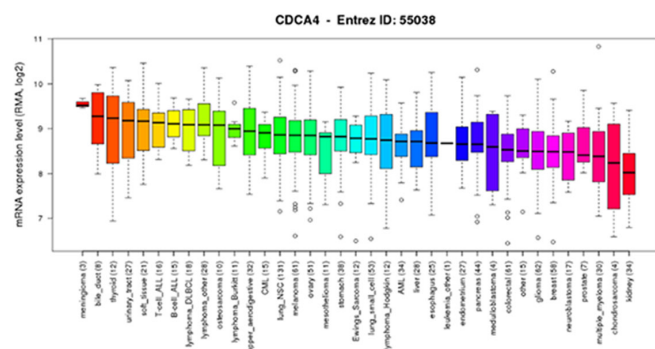

Supplementary Figure 1: CDCA4 mRNA expression level and breast cancer patient survival, copy variation number of CDCA in multiple types of cancers. mRNA expression level of CDCA4 in cancer cell lines (A).

**B**  
**CDCA4**

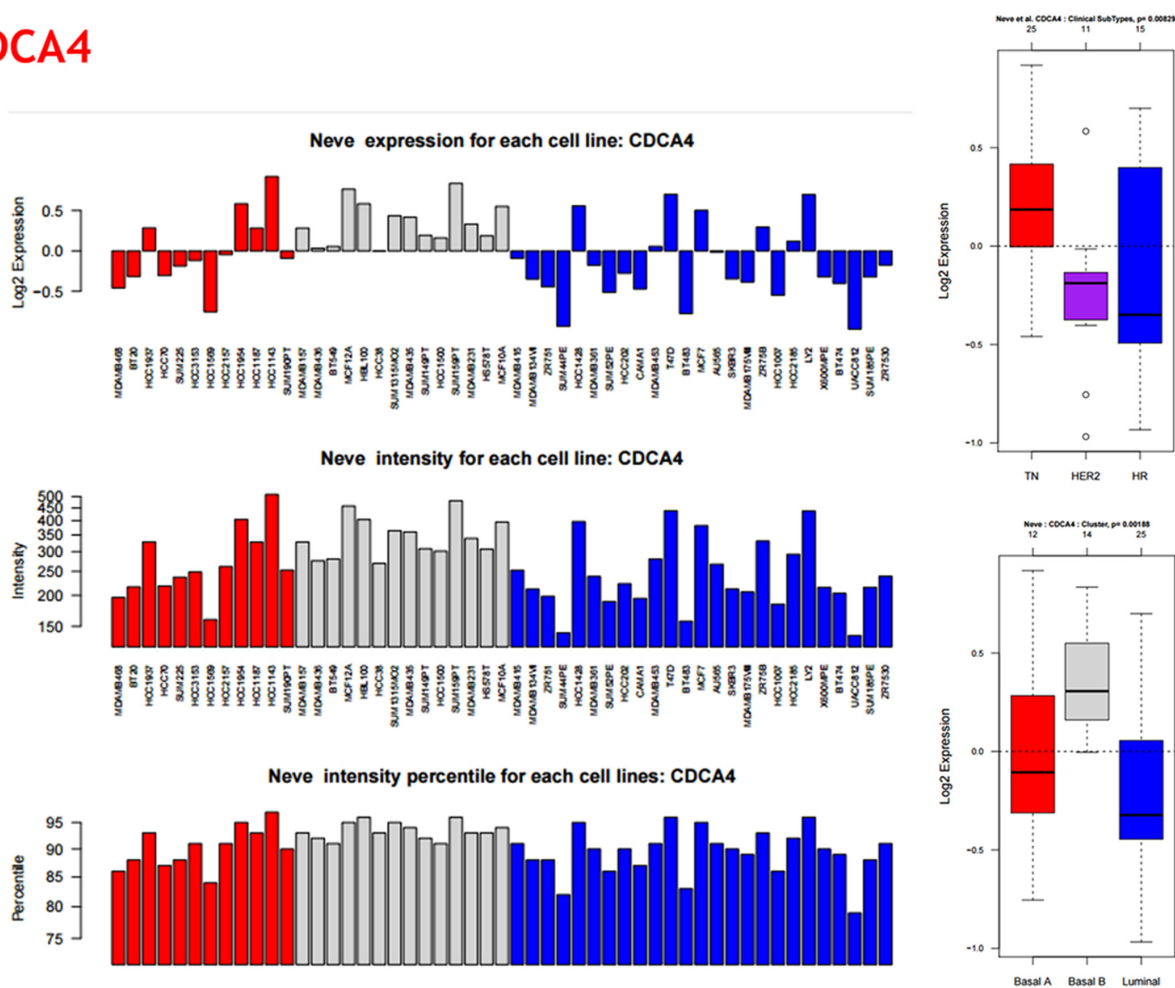

Supplementary Figure 1: (Continued) CDCA4 mRNA expression level and breast cancer patient survival, copy variation number of CDCA in multiple types of cancers. mRNA expression of CDCA4 in Neve breast cancer dataset (B).

C

CDCA4

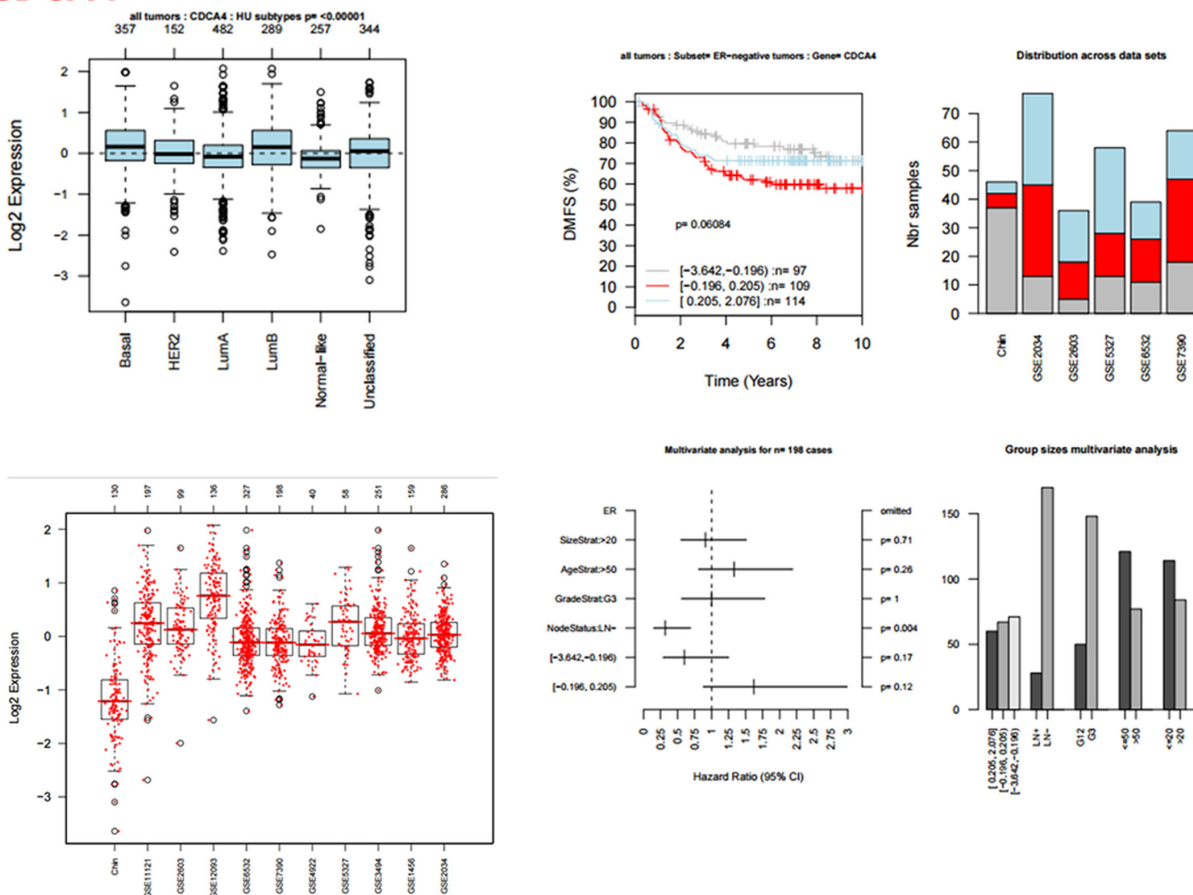

Supplementary Figure 1: (Continued) CDCA4 mRNA expression level and breast cancer patient survival, copy variation number of CDCA in multiple types of cancers. Expression of CDCA4 by GOBO database analysis (C).
